# Supplementary material for: The Influence of the Environment and Clothing on Human Exposure to Ultraviolet Light
Source: PubMed Central journal article supplement (PMC4414538; doi:10.1371/journal.pone.0124758), 2015-04-29
Supplement: pone.0124758.s002.pdf [file pone.0124758.s002.pdf]

BEIJING OBSTETRICS & GYNECOLOGY HOSPITAL, CAPITAL

MEDICAL UNIVERSITY

# Ethical Approval Form

|                                                            |                                                                                                                                                                                                                                                                                                                                                                                                                                                                |                                                                                                                               |              |                                                                        |
|------------------------------------------------------------|----------------------------------------------------------------------------------------------------------------------------------------------------------------------------------------------------------------------------------------------------------------------------------------------------------------------------------------------------------------------------------------------------------------------------------------------------------------|-------------------------------------------------------------------------------------------------------------------------------|--------------|------------------------------------------------------------------------|
| General information on the project                         | Protocol name                                                                                                                                                                                                                                                                                                                                                                                                                                                  | The Influence of the Environment and Clothing on Human Exposure to Ultraviolet Light                                          |              |                                                                        |
|                                                            | Protocol type                                                                                                                                                                                                                                                                                                                                                                                                                                                  | Scientific research                                                                                                           |              |                                                                        |
|                                                            | Overall responsibility                                                                                                                                                                                                                                                                                                                                                                                                                                         | <input checked="" type="checkbox"/> Yes                                                                                       | Multi-center | <input checked="" type="checkbox"/> No                                 |
|                                                            |                                                                                                                                                                                                                                                                                                                                                                                                                                                                | <input type="checkbox"/> No                                                                                                   |              | <input type="checkbox"/> Yes ; continue to complete:                   |
|                                                            | Type of review                                                                                                                                                                                                                                                                                                                                                                                                                                                 | <input checked="" type="checkbox"/> Initial review <input type="checkbox"/> Tracking review                                   |              |                                                                        |
| Brief description of project                               | This project is carried in a field at Beijing Obstetrics & Gynecology Hospital to measure ultraviolet intensity. This can not influence surrounding environment and disturb normal working order in hospital. In addition, experimenter takes good ultraviolet protection measures. A mannequin is utilized to measure ultraviolet intensity at different anatomical sites and this avoids kinds of damages caused by letting a person as the research object. |                                                                                                                               |              |                                                                        |
| Basic information on principal investigator of the project | Name                                                                                                                                                                                                                                                                                                                                                                                                                                                           | Wei Zhang                                                                                                                     | Department   | Neonatal Intensive Care Unit, Beijing Obstetrics & Gynecology Hospital |
|                                                            | Technical Post                                                                                                                                                                                                                                                                                                                                                                                                                                                 | Chief physician                                                                                                               | Mobile phone | 13901317623                                                            |
|                                                            | Title                                                                                                                                                                                                                                                                                                                                                                                                                                                          | Director of department                                                                                                        | E-mail       | zw2966@sina.com                                                        |
|                                                            | Correspondence Add.                                                                                                                                                                                                                                                                                                                                                                                                                                            | Neonatal Intensive Care Unit, Beijing Obstetrics & Gynecology Hospital, No. 251, Yaojiayuan Road, Changyang District, Beijing |              |                                                                        |
|                                                            | Main research direction                                                                                                                                                                                                                                                                                                                                                                                                                                        | Vitamin D; Ultraviolet B; Neonatal diseases                                                                                   |              |                                                                        |
| Review opinion of Ethics Committee office of the hospital  | Project related data are complete                                                                                                                                                                                                                                                                                                                                                                                                                              | <input checked="" type="checkbox"/> Yes<br><input type="checkbox"/> No                                                        |              |                                                                        |
|                                                            | <b>Recommendation opinion from ethical review:</b><br>This project is approved on the aspect of ethics.<br><b>Signed by the Director of Ethics Committee office of the hospital:</b><br><div style="text-align: right;">                     Teng Hong-hong<br/> 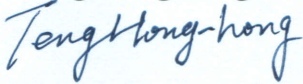<br/>                     Date: 2014.4.15                 </div>                                         |                                                                                                                               |              |                                                                        |
